# Supplementary material
Source: PubMed Central journal article supplement (PMC9306331)
Supplement: NIHMS1811192-supplement-supplemental_figures_and_methods.pdf [file NIHMS1811192-supplement-supplemental_figures_and_methods.pdf]

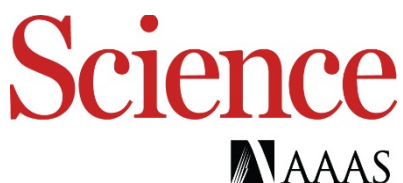

## Supplementary Materials for

### Structure of a Janus Kinase cytokine receptor complex reveals the basis for dimeric activation

**Authors:** Caleb R. Glassman<sup>1†</sup>, Naotaka Tsutsumi<sup>1,2†</sup>, Robert A. Saxton<sup>1,2</sup>,  
Patrick J. Lupardus<sup>1‡</sup>, Kevin M. Jude<sup>1,2</sup>, K. Christopher Garcia<sup>1,2,3\*</sup>

**Affiliations:**

<sup>1</sup>Department of Molecular and Cellular Physiology, Stanford University School of Medicine, Stanford, CA 94305, USA

<sup>2</sup>Howard Hughes Medical Institute, Stanford University School of Medicine, Stanford, CA 94305, USA

<sup>3</sup>Department of Structural Biology, Stanford University School of Medicine, Stanford, CA 94305, USA

\*Corresponding author. Email: [kcgarcia@stanford.edu](mailto:kcgarcia@stanford.edu)

†Equal contribution

‡Present address: Synthekine, Menlo Park, CA 94025, USA

**This PDF file includes:**

Materials and Methods

Supplementary Text

Figs. S1 to S5

Tables S1 to S2

## Materials and Methods

### Protein purification

To mimic cytokine receptor dimerization, a construct consisting of N-terminal glutathione S-transferase followed by a 9 amino acid linker (SDGSTSGSG), 3C protease site, GCN4 leucine zipper, and *Mus musculus* interferon lambda receptor 1 (IFN $\lambda$ R1) Box1/Box2 (mIFNIR1 249-298), which we refer to as mini-IFN $\lambda$ R1, was cloned into a modified pAc vector for baculoviral expression. For JAK expression, full-length *Mus musculus* Janus Kinase 1 (mJAK1 1-1153) with C-terminal BC2 (DRKAAVSHWQ) and 8xHis tags was cloned into pAc with or without activating V657F mutation.

To stabilize the complex, tandem BC2 nanobodies (37) separated by a 5 amino acid linker (GSRGS) were cloned into pD649 vector with N-terminal signal peptide and C-terminal AviTag and 6xHis tag (BiBC2 nanobody). Protein was expressed by transient transfection of Expi293F cells (Gibco) using ExpiFectamine 293 Transfection Kit (Gibco) according to manufacturer's protocols. Supernatants were subject to Ni-NTA purification and Size Exclusion Chromatography (SEC) using Superdex 75 10/300 GL column (Cytiva).

*Spodoptera frugiperda* (Sf9) ovarian cells (ATCC) were maintained in Sf-900 III medium (Gibco) with 10% (v/v) FBS (Sigma) and GlutaMAX (Gibco) and baculovirus was produced by transfection with FuGENE HD (Promega) and BestBac 1.0 Linearized Baculovirus DNA (Expression Systems) followed by viral amplification in Sf9. Protein was expressed in *Trichoplusia ni* (*T. ni*) ovarian cells (Expression Systems) maintained in ESF 921 Insect Cell Culture Medium (Expression Systems) at 27°C with ambient CO<sub>2</sub> and gentle agitation. *T. ni* cells were coinfecting with mini-IFN $\lambda$ R1 and mJAK1 baculovirus for 48 hours. Cells were washed once in Phosphate Buffered Saline (PBS) pH7.4 and resuspended in a lysis buffer of 50 mM Tris-HCl

pH 8.5, 0.5 M NaCl, 1 mM adenosine (Sigma), 1 mM TCEP, and 10% (v/v) glycerol supplemented with 15 mM imidazole, protease inhibitor cocktail (Sigma), and benzonase (Sigma). Cells were lysed by Dounce homogenization followed by ultracentrifugation and the soluble fraction was subject to affinity purification using High Affinity Ni-Charged Resin (GenScript) in the presence of 0.005% (w/v) n-dodecyl  $\beta$ -D-maltoside (DDM). Nickel resin was washed with lysis buffer supplemented with 30 mM imidazole and 0.005% (w/v) DDM prior to elution with increased imidazole concentration to 250 mM. To capture mJAK1-IFN $\lambda$ R1 complex, the elution was incubated with Glutathione Sepharose 4 Fast Flow Resin (Cytiva) prior to washing in buffer composed of 20 mM HEPES-Na pH 8.0, 0.5 M NaCl, 1 mM adenosine, 1mM TCEP, 10% (v/v) glycerol, and 0.005% (w/v) DDM. GST-tagged protein was eluted in wash buffer supplemented 20 mM reduced glutathione and adjusted to pH 7.4. Glutathione elution was concentrated and buffer exchanged in glutathione wash buffer prior to complexing with stoichiometric BiBC2 nanobody and cleaving with 1:10 (w/w) 3C protease for 1 hour at room temperature. Superose 6 (Cytiva) SEC was used to separate mJAK1-IFN $\lambda$ R1 complex from free GST in a buffer consisting of 20 mM HEPES-Na pH 8.0, 0.5 M NaCl, 1 mM adenosine, 1% (v/v) glycerol, and 1 mM TCEP. Fractions containing complex were passed over a glutathione column to remove any residual un-cleaved protein and free GST. Purified sample was crosslinked with 1 mM bis(sulfosuccinimidyl)suberate (BS3) (Thermo) for 30 min at room temperature and quenched with 20 mM Tris-HCl pH 8. The cross-linked complex was buffer-exchanged to 20 mM HEPES-Na pH 8, 0.5 M NaCl, 1 mM adenosine, 1% (v/v) glycerol, and 1 mM TCEP on a Vivaspin 500 centrifugal concentrators (Satorius, 100,000 MWCO) and concentrated to 6 mg/ml for cryo-EM experiments.

Cryo-EM sample preparation, data collection, processing, and 3D reconstruction

To prepare the cryo-EM specimens, cross-linked complex was supplemented with 0.005% DDM immediately before freezing. 3.0  $\mu\text{L}$  of sample was applied to a glow-discharged 300 mesh gold grid (Quantifoil R1.2/1.3) and excess sample was blotted to a filter paper for 3 sec before plunge-freezing using a Leica EM GP (Leica Microsystems) at 20°C and 95% humidity. Cryo-EM movies were collected using an FEI Titan Krios operated at 300 kV equipped with Gatan K3 camera in counting mode. Nominal magnification was set to 29,000x, corresponding to a calibrated magnification of 58,680x and a super-resolution pixel size of 0.42605 Å. Movies were recorded using SerialEM (62) for 2.5 sec with 0.05 sec exposure per frame at an exposure rate of  $\sim 16$  electrons/pixel/sec at the specimen, and the defocus range between -1.0 and -2.0  $\mu\text{m}$ . A beam-image shift was used with an active calibration to collect 18 movies from 9 holes per stage shift and autofocus.

Collected movies were processed and assessed with cryoSPARC Live. Patch motion correction was performed with binning to a pixel size of 0.8521 Å, and patch contrast transfer function (CTF) parameters were estimated with a default setting. Curated 29,467 movies were used for the downstream processing with cryoSPARC (63). Particles were picked with 2D templates from preliminary experiments and extracted with a box size of 400 pixels, binned to 64 pixels. Multiple rounds of 2D classifications were used to remove extracted buffer features and contaminants, yielding 1,429,325 particles that appeared to be protein. After re-extracting particles with the 400/256 binned box, further 2D classifications, a 2-class ab-initio reconstruction followed by two rounds of heterogeneous refinements generated 589,565-particle set for an initial non-uniform refinement (64). At this stage, we were able to locate individual domains and the “nanobody clump” in the consensus refined map (**Fig. S2**). 3-component 3D variability analysis (65) was performed for this aligned particle set which allowed us to identify two classes for further

heterogeneous refinement: 1 - a class with the clearer FERM-SH2 dimer and one of the nanobodies poorly visualized, and 2 - a class with the partially broken FERM-SH2 dimer and the better defined nanobody dimer. The former class could be refined with C2 symmetry which resulted in a JAK1-IFN $\lambda$ R1 dimer and blurred nanobody densities. A C2 symmetry-imposed *ab-initio* 3D reconstruction, heterogeneous refinements, a non-uniform refinement, and CTF refinements (per-group tilt and anisotropic magnification, and per-particle CTFs) followed by a non-uniform refinement yielded a 4.0 Å nominal resolution map with 224,615 particles as determined by gold-standard Fourier shell correlation (FSC) using the 0.143 criterion. The final map was generated with a local non-uniform refinement with a mask covering the whole mIFN $\lambda$ -mJak1 complex but excluding the nanobodies, which yielded 3.6 Å nominal resolution map. Focused classifications and refinements with C2 symmetry expansion and various local masks did not generate a better particle set or a 3D reconstruction based on visual inspections of the maps. The final map was sharpened with the full map-based deepEMhancer (66) for model building and overall map representation, and the half map-based Phenix (67) local anisotropic sharpening for model building, visualization of local maps overlaid on the structural model, and real-space refinement.

### Model building and refinement

The crystal structures of human JAK1 FERM-SH2 (PDB ID: 5IXD), PK (4L00), and TK (3EYG) were docked into the 3D reconstructions using UCSF ChimeraX (68) for an initial interpretation of the maps (14,39,40). A homology model of full-length mouse JAK1 was then created using the docked model on the SWISS-MODEL server (swissmodel.expasy.org). The SH2 domain was replaced with the AlphaFold2 model (69), and the overall structure was fitted into the cryo-EM map with segmental rigid-body fits on Coot (70). The model was corrected and refined iteratively

using Coot for manual building, ISOLDE (71) on ChimeraX to improve the geometry and secondary structures, and Phenix for real-space refinement. We used the unsharpened map, deepEMhanceer sharpened map, and Phenix local anisotropic sharpened map for modeling. The structure and map were visualized using UCSF ChimeraX. All secondary structures in the figures were assigned using DSSP. Shape complementarity statistics were quantified using SC implemented in CCP4 (72). The map counter levels are indicated either in figure captions or panels when appropriate. The buried surface area was calculated using PDBePISA ([www.ebi.ac.uk/pdbe/pisa](http://www.ebi.ac.uk/pdbe/pisa)) (73). Active-state human JAK2 Val<sup>617</sup>→Phe model was generated with the SWISS-MODEL server using the full JAK2 sequence, and the current structure as a template.

#### Cell signaling assays

To assess the ability of mini-IFN $\lambda$ R1 to activate JAK1, we infected *T. ni* cells with baculovirus encoding mJAK1 (wild-type or V657F) and mini-IFN $\lambda$ R1. After 48 hours of infection, cells were harvested, washed once in ice-cold PBS, and lysed in PBS supplemented with 1% (w/v) DDM and one tablet of cOmplete protease inhibitor cocktail (Roche) per 10 mL lysis buffer. Lysates were resolved on 12% SDS-PAGE (BioRad) and transferred to PVDF membranes using Trans-Blot Turbo Transfer System (BioRad). Membranes were blocked for 1 hour in TBS-T (20 mM Tris-HCl pH7.4, 150 mM NaCl, 0.1% (v/v) Tween 20) containing Blotting-Grade Blocker (BioRad). Primary antibodies against phosphoTyr1034-1035 JAK1 (Cell Signaling Technology clone 3331) and total JAK1 (Cell Signaling Technologies clone 6G4) were detected with swine anti-rabbit HRP (Dako) and enhanced chemiluminescence (ECL) detection reagent (Cytiva). Blots were developed on Hyperfilm ECL (Cytiva).

For mammalian cell signaling experiments, mouse erythropoietin receptor (mEpoR 25-507) was cloned into pLV lentiviral vector with N-terminal HA signal peptide and HA tag. To generate the mEpoR-IFN $\lambda$ R1 Box1/Box2 chimera, the Box1/Box2 region of EpoR (273-338) was replaced with that of IFN $\lambda$ R1 (249-298). NIH 3T3 mouse fibroblasts were maintained in Dulbecco's Modified Eagle Medium (DMEM, Gibco), supplemented with 10% FBS (Sigma) and 2 mM GlutaMAX (Gibco). Receptor constructs were transiently transfected into NIH 3T3 cells using FuGene HD transfection reagent (Promega). 48 hours post transfection, cells were stimulated for 20 min with 10 ng/mL mouse erythropoietin (Epo, R&D systems). Cells were rinsed once with ice-cold PBS and lysed with Triton lysis buffer (1% (v/v) Triton X-100, 20 mM HEPES-Na pH 7.4, 150 mM NaCl) supplemented with one tablet of PhosSTOP phosphatase inhibitor cocktail (Roche), and one tablet of EDTA-free cOmplete protease inhibitor cocktail (Roche) per 10 ml of buffer. The cell lysates were cleared by centrifugation at 15,000g at 4°C for 10 min. Cell lysates were denatured by the addition of SDS sample buffer and boiling for 5 min, resolved by SDS-PAGE, and analyzed by immunoblotting as described above with the addition of primary antibodies against phospho-Tyr1007 JAK2 (Cell Signaling Technologies clone D15E2), phospho-Tyr1034/1035 JAK1 (Cell Signaling Technologies clone 3331), total JAK2 (Cell Signaling Technologies clone D2E12), and total JAK1 (Cell signaling technologies clone 6G4).

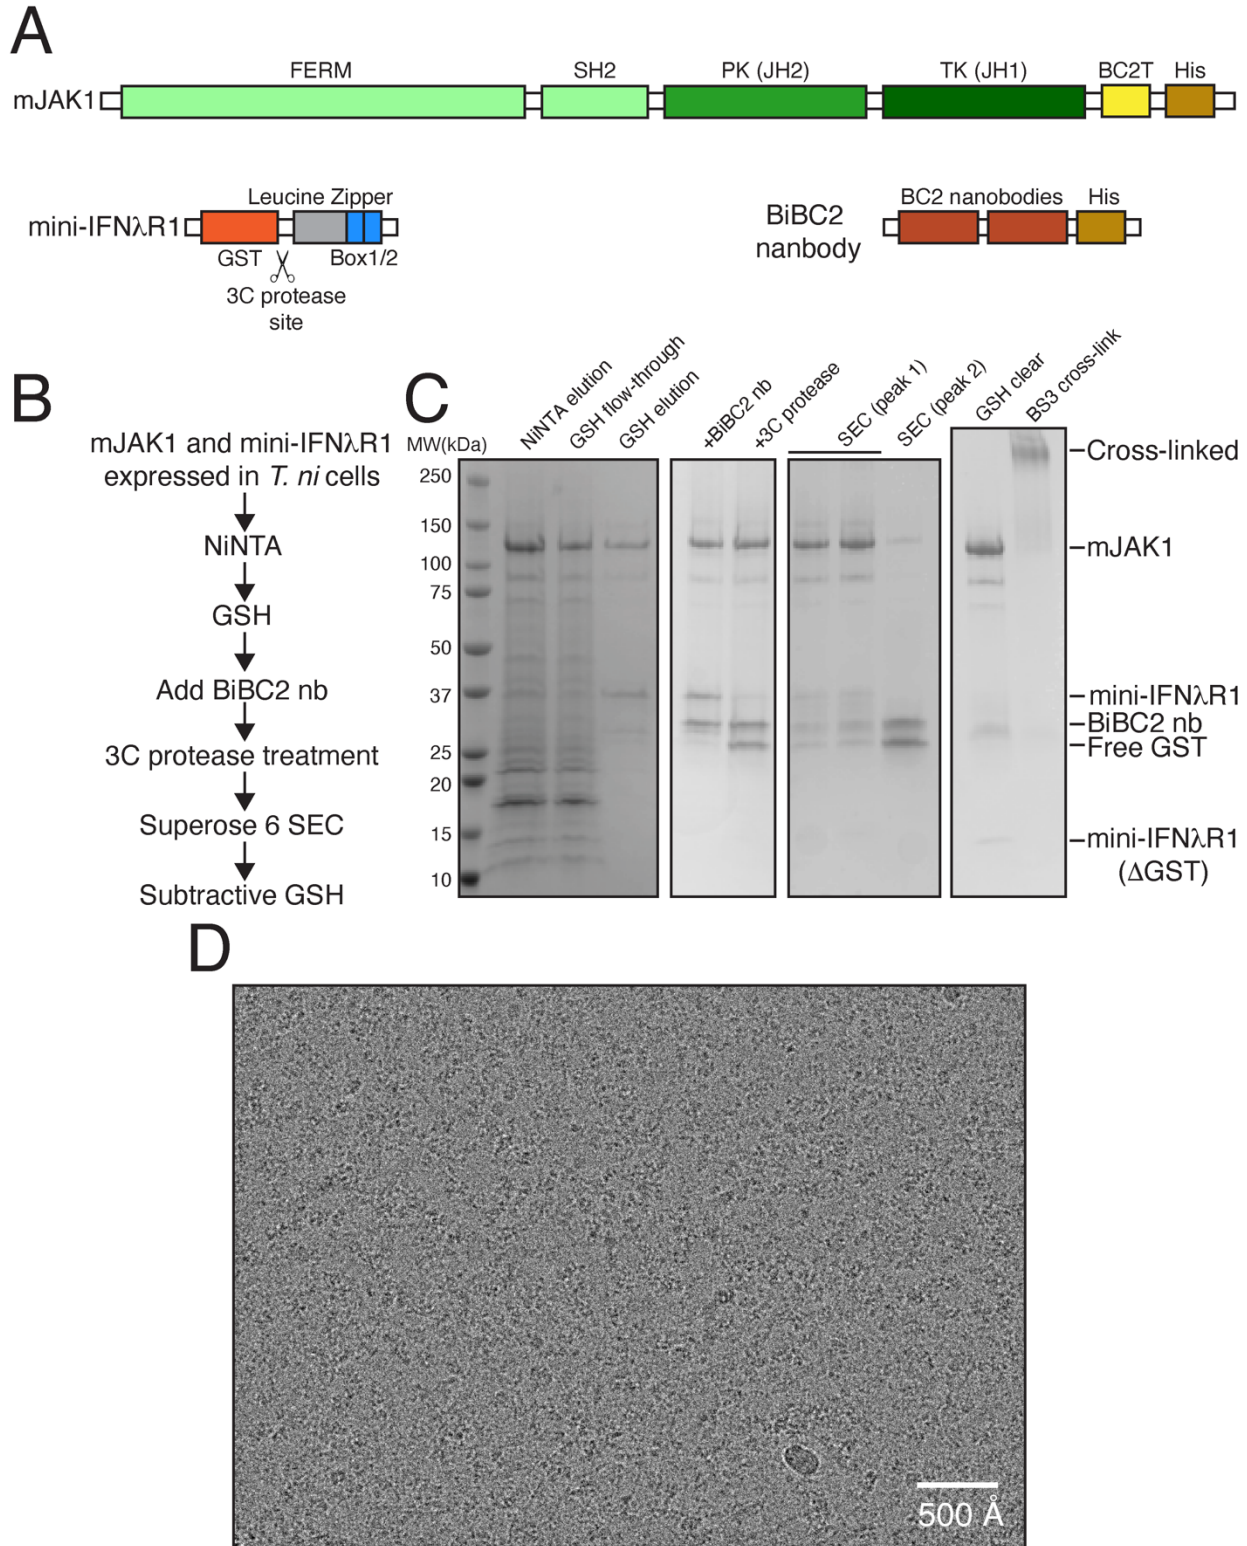

**Fig. S1. Purification and cryo-EM imaging of an active JAK1-IFN $\lambda$ R1 complex.**



(A) Linear schematic of the JAK1-IFN $\lambda$ R1 complex. The complex is held together at the top by homodimeric leucine zippers fused to Box1/Box2 of IFN $\lambda$ R1 which engage the FERM-SH2 domains of mJAK1 and at the bottom by a tandem BC2 nanobody (BiBC2) which engages an BC2 tag (BC2T) at the C-terminus of mJAK1. (B) Overview of the two-step affinity purification scheme to capture active JAK1-IFN $\lambda$ R1 complex. (C) SDS-PAGE of the purification process. Samples were run on a 4-20% gradient gel and visualized using colloidal blue staining. (D) Representative micrograph from cryo-EM data collection.

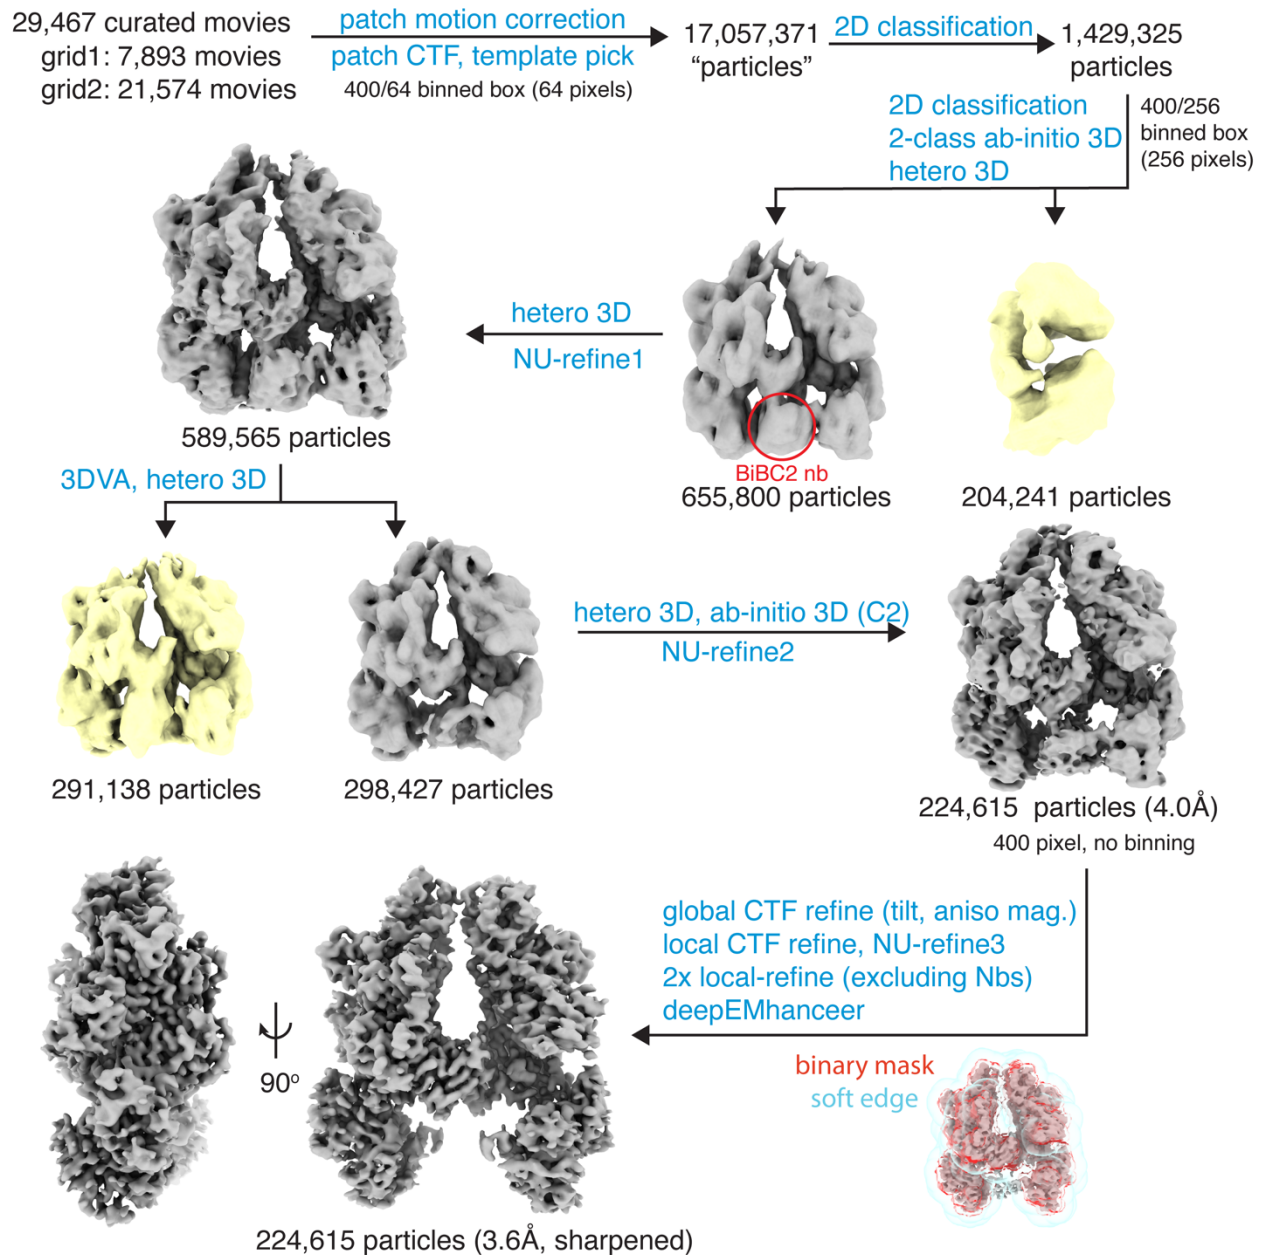

**Fig. S2. Cryo-EM data processing scheme.** Cryo-EM data analysis workflow is shown with representative 3D reconstructions during the data processing. BiBC2 nanobody is indicated by the red circle in the figure where first observed in the cryo-EM density. Template pick: template-based particle picking and extraction, ab-initio 3D: ab-initio 3D reconstruction, hetero 3D: heterogeneous 3D refinement, NU-refine: non-uniform refinement, 3DVA: 3D variability analysis, local-refine:

non-uniform local refinement with the mask indicated at the right bottom (red: binary mask, blue: soft mask edge).

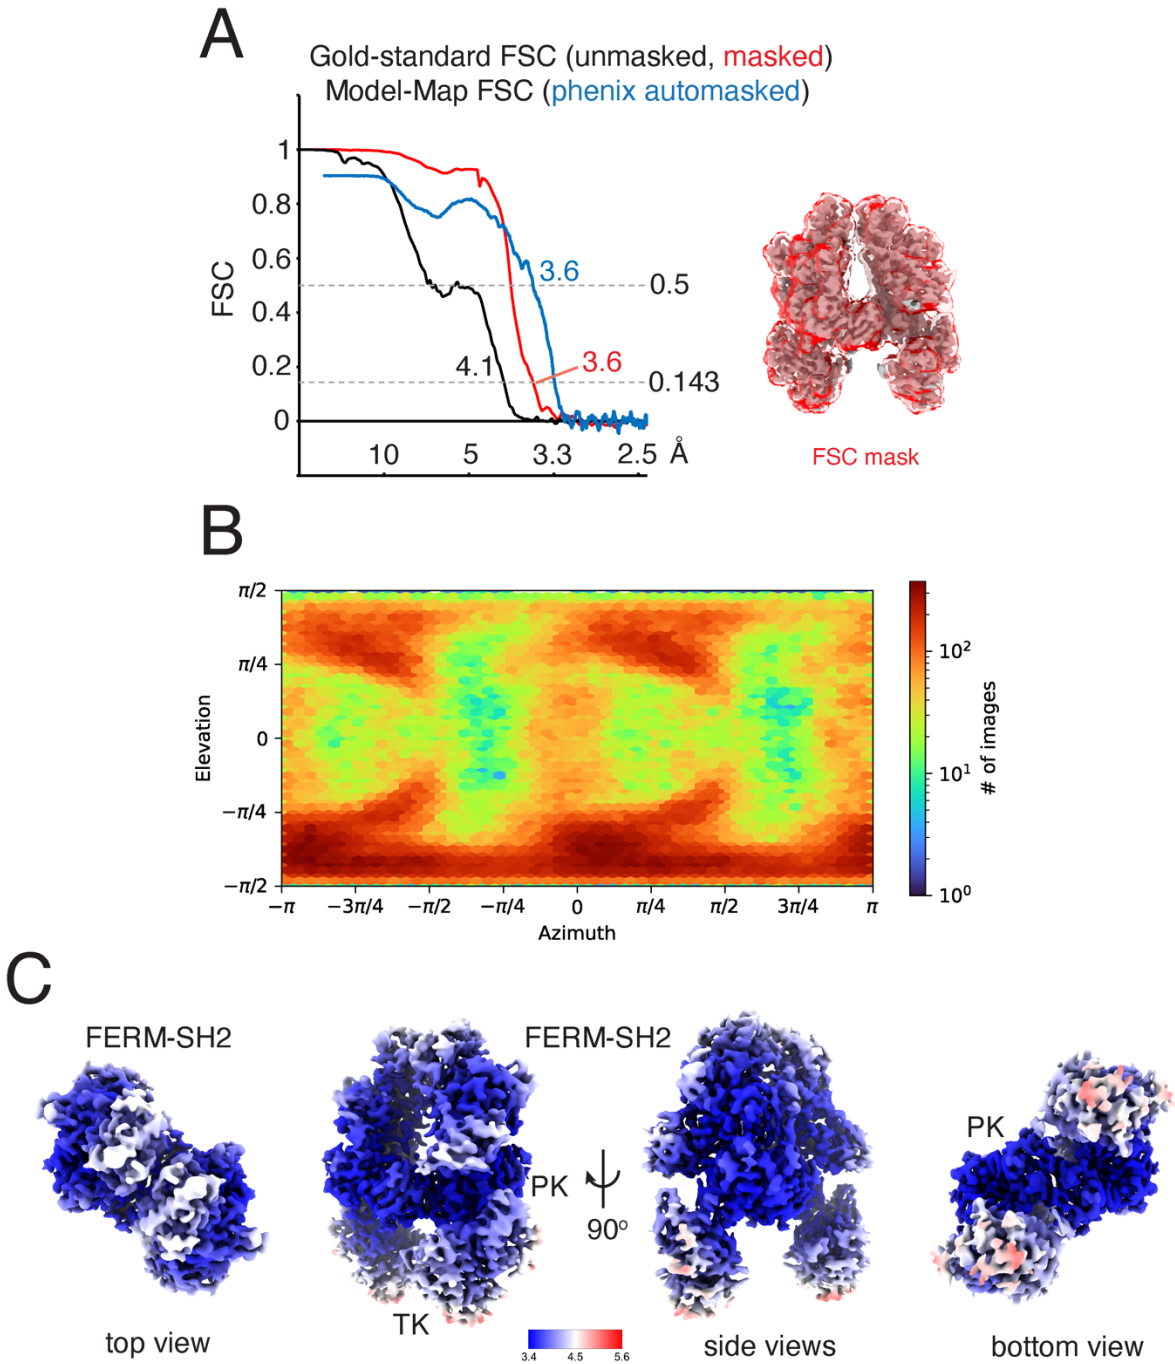

**Fig. S3. Cryo-EM data assessment.** (A) Gold-standard FSC curves with (black) or without (red) the FSC mask shown on the right as semi-transparent surface (red) overlaid on the deepEMhancer sharpened map (gray), and model-map FSC curve (blue). The gold-standard FSC was calculated

using cryoSPARC, and the model-map FSC was made with Phenix. **(B)** Orientation distribution of the alignment particles in the final 3D reconstruction output from cryoSPARC. **(C)** Local resolution estimates by Phenix color on the surface representation of the deepEMhancer sharpened map. The blue-white-red gradient corresponds to 3.4, 4.5, and 5.6 Å resolution, respectively.

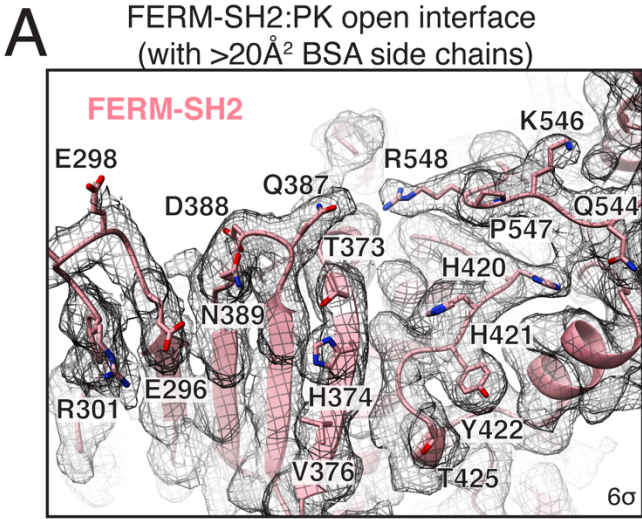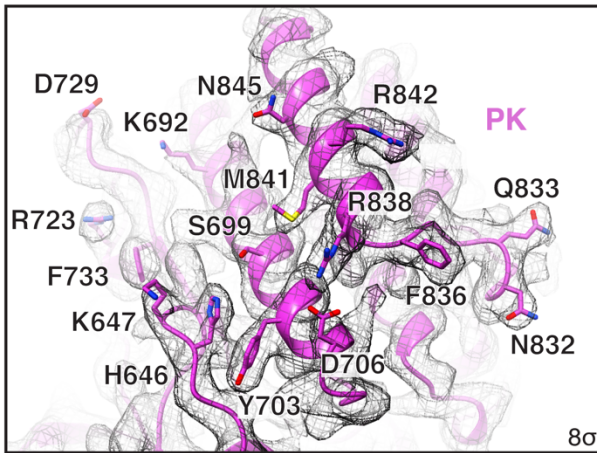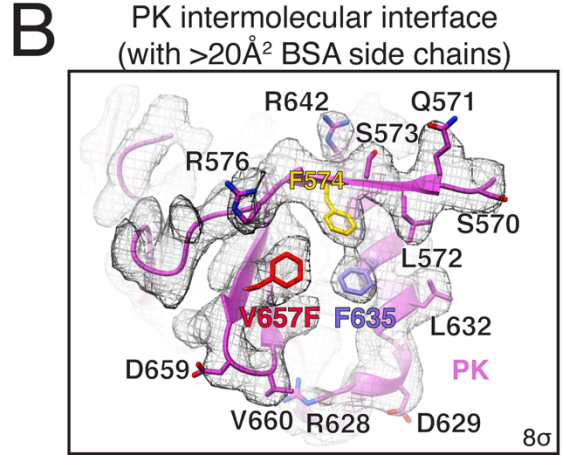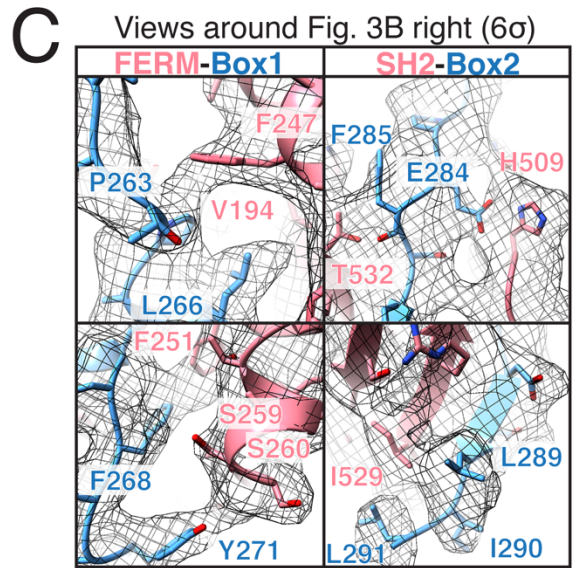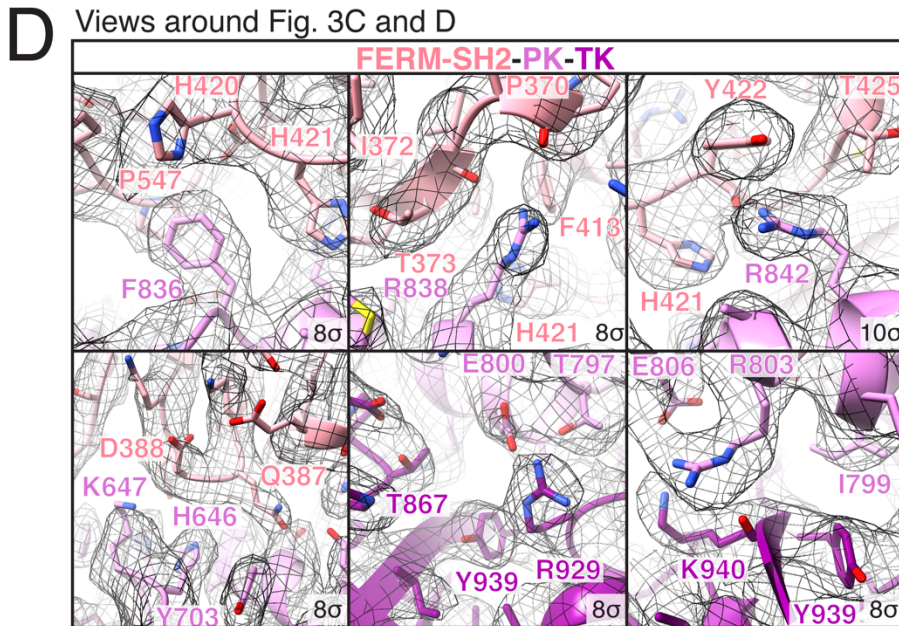

**Fig. S4. Representative cryo-EM density at the interfaces.** (A) The open interface of the intramolecular FERM-SH2:PK packing in a mJAK1 monomer unit. The cryo-EM map (black) is overlaid on the ribbon models of FERM-SH2 (top, pink) and PK (bottom, orchid). (B) The mJAK1 intermolecular PK-PK interface. The cryo-EM map (black) is overlaid on the ribbon models of PK (orchid). The amino acid residues contributing to the interface formation with  $>20\text{\AA}^2$  buried surface area (BSA) are shown as sticks. Phenylalanine side chains are colored in gold (Phe<sup>574</sup>), slate blue (Phe<sup>635</sup>) and red (Phe<sup>657</sup>). (C) Cryo-EM density depicted around the IFN $\lambda$ R1 Box1-mJAK1 FERM (top) and IFN $\lambda$ R1 Box2-mJAK1 SH2 (bottom) interfaces, corresponding to the region around the main figure 3B right. (D) Cryo-EM density for the mJAK1 intramolecular packing, corresponding to the region around the main figure 3C and D. The map counter levels are indicated in the figure panels.

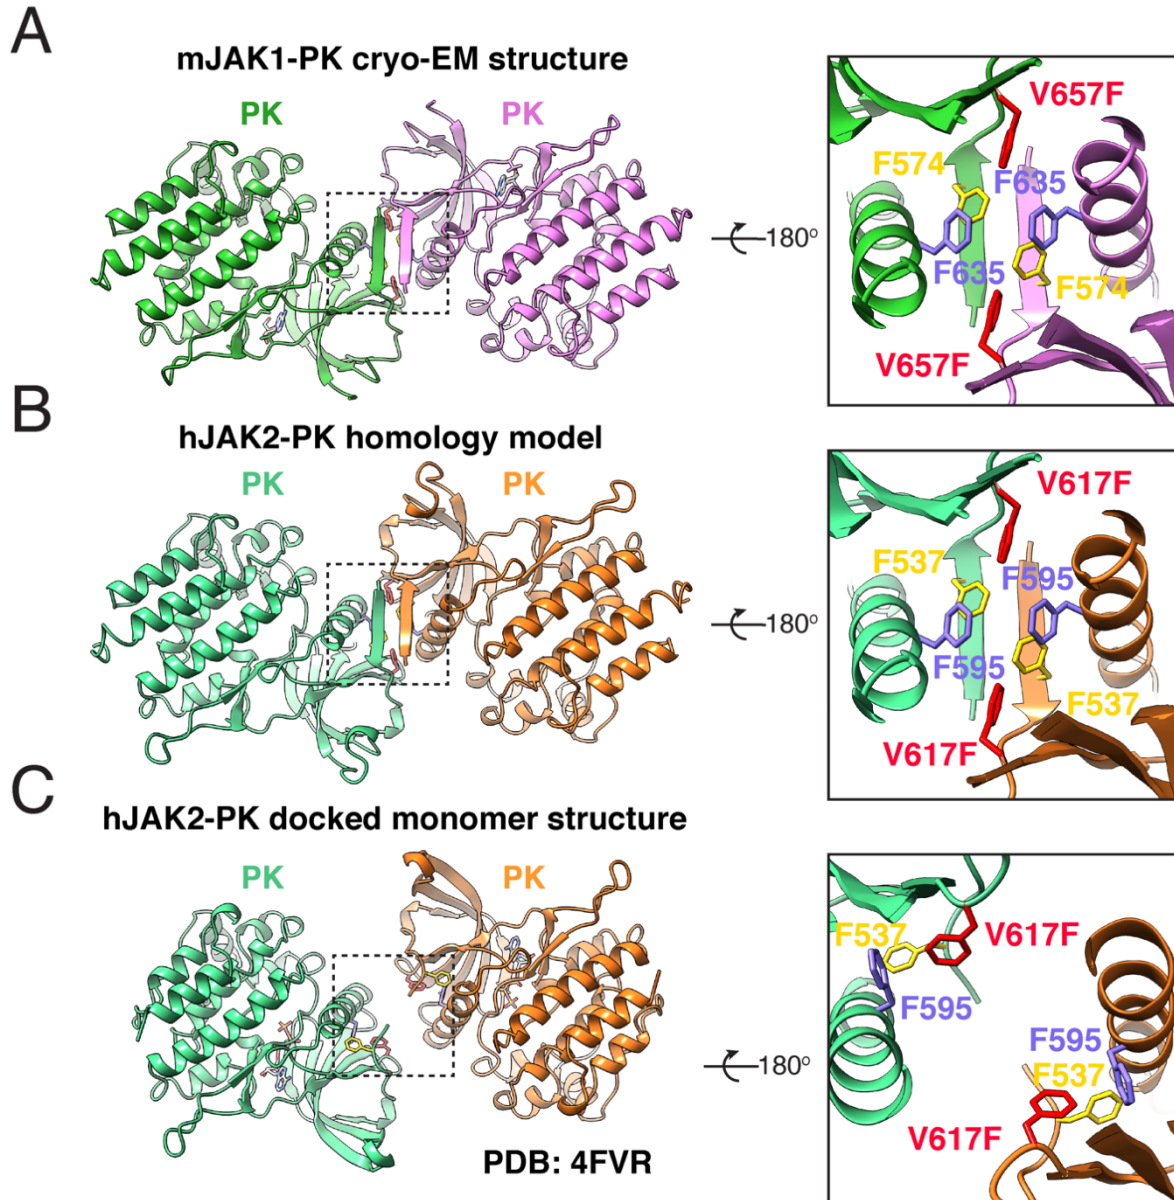

**Fig. S5. Homology model of the active hJAK2 PK homodimer.** (A) Cryo-EM structure of the 2:2 JAK1-IFN $\lambda$ R1 Val $\rightarrow$ Phe PK dimer as viewed from the top (left) and bottom (right). PK domains are colored in green and orchid, phenylalanine side chains are colored in gold (Phe<sup>574</sup>), slate blue (Phe<sup>635</sup>) and red (Phe<sup>657</sup>). (B) Homology model of the hJAK2 Val $\rightarrow$ Phe dimer generated with the SWISS-MODEL server based on the cryo-EM structure of the mJAK1-IFN $\lambda$ R1 dimer.



The JAK2 homology model shows similar PK dimerization observed in the JAK1 complex with the anti-parallel  $\beta$ -sheet and phenylalanine cluster. JAK2 PK domains are colored green and orange. Phenylalanine triad is colored as follows: gold (Phe<sup>537</sup>), slate blue (Phe<sup>595</sup>) and red (Phe<sup>617</sup>)

(C) Monomeric hJAK2 PK Val $\rightarrow$ Phe crystal structure (PDB ID: 4FVR) aligned to the JAK1-IFN $\lambda$ R1 cryo-EM structure reported here. Monomer structure shows movement of Phe<sup>595</sup> and Phe<sup>617</sup> side chains relative to their position within the active JAK1-IFN $\lambda$ R1 dimer. Phe<sup>537</sup> in the SH2-PK linker is rotated outwards placing the aromatic ring away from the dimerization interface observed in the JAK1-IFN $\lambda$ R1 structure.



**Fig. S6. Sequence alignment of Janus Kinase family members.** Amino acid sequences of mouse JAK1, human JAK1, human JAK2, human JAK3, and human TYK2 were aligned using MAFFT version 7 ([www.mafft.cbrc.jp/alignment/server/](http://www.mafft.cbrc.jp/alignment/server/)) and colored according to percentage identity using Jalview 2.11.17.

| mIFN- $\lambda$ -mJak1 V657F homodimer<br>(EMDB-25715, PDB 7T6F) |                                                                                    |
|------------------------------------------------------------------|------------------------------------------------------------------------------------|
| <b>Data collection and processing</b>                            |                                                                                    |
| Nominal magnification                                            | 29,000x                                                                            |
| Calibrated magnification                                         | 58,680x                                                                            |
| Voltage (kV)                                                     | 300                                                                                |
| Electron exposure (e/Å <sup>2</sup> )                            | 55                                                                                 |
| Defocus range (μm)                                               | -1.0 to -2.0                                                                       |
| Pixel size (Å)                                                   | 0.8521                                                                             |
| Symmetry imposed                                                 | C2                                                                                 |
| Initial "particle" images (no.)                                  | 17,057,371                                                                         |
| Protein particle images (no.)                                    | 1,429,325                                                                          |
| Final particle images (no.)                                      | 224,615                                                                            |
| Map resolution (Å)                                               | 3.6                                                                                |
| FSC threshold                                                    | 0.143                                                                              |
| Map resolution range (Å)                                         | 3.4 to 5.6                                                                         |
| <b>Refinement</b>                                                |                                                                                    |
| Initial model used (PDB code/AF2 code*)                          | 5IXD, 4L00, 3EYG/AF-P52332-F1                                                      |
| Model resolution (Å)                                             | 3.6                                                                                |
| FSC threshold                                                    | 0.5                                                                                |
| Map sharpening method                                            | deepEMhanceer (visualization)<br>Phenix LocalAniso<br>(refinement&visualization)** |
| <b>Model composition</b>                                         |                                                                                    |
| Non-hydrogen atoms                                               | 17,062                                                                             |
| Protein residues                                                 | 2,164                                                                              |
| Ligands                                                          | 4 (2 ADN and 2 ADP)                                                                |
| <b>B factors (Å<sup>2</sup>)</b>                                 |                                                                                    |
| Protein                                                          | 106.58                                                                             |
| Ligand                                                           | 98.51                                                                              |
| <b>R.m.s. deviations</b>                                         |                                                                                    |
| Bond lengths (Å)                                                 | 0.003                                                                              |
| Bond angles (°)                                                  | 0.548                                                                              |
| <b>Validation</b>                                                |                                                                                    |
| MolProbity score                                                 | 1.74                                                                               |
| Clashscore                                                       | 4.82                                                                               |
| Poor rotamers (%)                                                | 2.22                                                                               |
| <b>Ramachandran plot</b>                                         |                                                                                    |
| Favored (%)                                                      | 96.53                                                                              |
| Allowed (%)                                                      | 3.47                                                                               |
| Disallowed (%)                                                   | 0                                                                                  |
| EMRinger score                                                   | 2.35                                                                               |

\*AlphaFold2 model. \*\*Phenix local anisotropic sharpening based on half maps.

**Table S1. Cryo-EM data collection and refinement statistics.**

|                   | V657F (PDB: 7T6F)     | F657->V657 model | F657/V657     |
|-------------------|-----------------------|------------------|---------------|
| <b>Interface</b>  | SC                    |                  | SC ratio (%)  |
| PK:PK             | 0.530                 | 0.510            | 104           |
| <b>Residues</b>   | BSA (Å <sup>2</sup> ) |                  | BSA ratio (%) |
| Met569            | 11.9                  | 11.9             | 100           |
| Ser570            | 57.1                  | 57.1             | 100           |
| Gln571            | 44.4                  | 44.3             | 100           |
| Leu572            | 71.5                  | 67.4             | 106           |
| Ser573            | 27.3                  | 27.2             | 100           |
| Phe574            | 62.8                  | 68.1             | 92            |
| Asp575            | 18.7                  | 18.7             | 100           |
| Arg576            | 116.8                 | 123.1            | 95            |
| Arg628            | 21.4                  | 21.4             | 100           |
| Asp629            | 39.2                  | 39.2             | 100           |
| Leu632            | 66.5                  | 69.8             | 95            |
| Phe635            | 40.3                  | 38.7             | 104           |
| Glu636            | 18.2                  | 18.2             | 100           |
| Arg642            | 28.0                  | 28.0             | 100           |
| <b>Phe/Val657</b> | <b>67.3</b>           | <b>54.8</b>      | <b>123</b>    |
| Asp659            | 35.1                  | 35.0             | 100           |
| Val660            | 30.7                  | 30.7             | 100           |

**Table S2. Shape complementarity statistic (SC) and residue-by-residue buried surface area (BSA) at the mJAK1 intermolecular PK:PK interface.** BSAs were calculated using the PDBe-PISA server ([www.ebi.ac.uk/pdbe/pisa/](http://www.ebi.ac.uk/pdbe/pisa/)), and amino acid residues with >10Å<sup>2</sup> BSA are listed. Sc values were quantified using CCP4 SC.

| REAGENT or RESOURCE                                                 | SOURCE                      | IDENTIFIER        |
|---------------------------------------------------------------------|-----------------------------|-------------------|
| <b>Antibodies</b>                                                   |                             |                   |
| JAK1 (6G4) Rabbit mAb                                               | Cell Signaling Technologies | Cat#3344S         |
| Phospho-Jak1 (Tyr1034/1035) Antibody                                | Cell Signaling Technologies | Cat#3331          |
| Jak2 (D2E12) Rabbit mAb                                             | Cell Signaling Technologies | Cat#3230S         |
| Phospho-Jak2 (Tyr1007) (D15E2) Rabbit mAb                           | Cell Signaling Technologies | Cat#4406          |
| Anti-rabbit Ig HRP                                                  | Dako                        | Cat#P0399         |
| <b>Cell Lines</b>                                                   |                             |                   |
| Expi293F                                                            | Gibco                       | Cat#A14527        |
| <i>Spodoptera frugiperda</i> (Sf9)                                  | ATCC                        | Cat#CRL-1711      |
| <i>Trichoplusia ni</i> (T. ni)                                      | Expression Systems          | Cat#94-002F       |
| NIH 3T3                                                             | ATCC                        | Cat#CRL-1658      |
| <b>Chemicals and commercial reagents</b>                            |                             |                   |
| Cellfectin II                                                       | Gibco                       | Cat#10362100      |
| ExpiFectamine 293 Transfection Kit                                  | Gibco                       | Cat#A14525        |
| BestBac 1.0 Linearized Baculovirus DNA                              | Expression systems          | Cat#91-001        |
| FuGene HD transfection reagent                                      | Promega                     | Cat#E2312         |
| Expi293 Expression Medium                                           | Gibco                       | Cat#A1435101      |
| Sf-900 III Media                                                    | Invitrogen                  | Cat#12658019      |
| ESF 921 Insect Cell Culture Medium                                  | Expression Systems          | Cat#96-001-01     |
| Dulbecco's Modified Eagle Medium (DMEM), high glucose, no glutamine | Gibco                       | Cat#11960044      |
| Fetal Bovine Serum (FBS)                                            | Sigma-Aldrich               | Cat#F7524         |
| cOmplete protease inhibitor cocktail                                | Roche                       | Cat#11697498001   |
| Protease Inhibitor Cocktail                                         | Sigma-Aldrich               | Cat#P8849         |
| Phosphate-buffered saline (PBS), pH 7.2                             | Gibco                       | Cat#20012027      |
| Blotting-Grade Blocker                                              | BioRad                      | Cat#1706404       |
| GlutaMAX                                                            | Gibco                       | Cat#35050061      |
| 12% Mini-PROTEAN TGX Precast Protein Gels                           | BioRad                      | Cat#4561046       |
| Trans-Blot Turbo RTA Mini 0.2µm PVDF Transfer Kit                   | BioRad                      | Cat#1704272       |
| ECL Prime Western Blotting Detection Reagent                        | Cytiva                      | Cat#45002401      |
| Hyperfilm ECL                                                       | Cytiva                      | Cat#28906839      |
| Mouse erythropoietin (Epo)                                          | R&D systems                 | Cat#959-ME-010/CF |
| PhosSTOP                                                            | Roche                       | Cat#4906845001    |
| High Affinity Ni-Charged Resin                                      | GenScript                   | Cat#L00223        |
| Glutathione Sepharose 4 Fast Flow                                   | Cytiva                      | Cat#17513201      |
| Superose 6 Increase 10/300 GL                                       | Cytiva                      | Cat#29091596      |
| Superdex 75 10/300 GL                                               | Cytiva                      | Cat#29148721      |
| n-Dodecyl β-D-maltoside (DDM), Sol-Grade                            | Anatrace                    | Cat#D310S         |
| Tween 20                                                            | Sigma-Aldrich               | Cat#P1379         |
| Triton X-100                                                        | Sigma-Aldrich               | Cat#X100          |
| Tris Hydrochloride (Tris-HCl)                                       | Fisher Scientific           | Cat#BP153         |
| Tris-Base                                                           | Fisher Scientific           | Cat#BP152         |
| HEPES                                                               | Fisher Scientific           | Cat#BP310         |
| Imidazole                                                           | ACROS Organics              | Cat#122025000     |

|                                                       |                   |            |
|-------------------------------------------------------|-------------------|------------|
| Sodium Chloride                                       | Fisher Scientific | Cat#S271   |
| Benzonase Nuclease                                    | Sigma-Aldrich     | Cat#E1014  |
| Vivaspin 500, 100,000 MWCO                            | Satorius          | Cat#VS0142 |
| L-Glutathione reduced (GSH)                           | Sigma-Aldrich     | Cat#G4251  |
| Tris(2-carboxyethyl)phosphine (TCEP)                  | Thermo Scientific | Cat#77720  |
| Adenosine                                             | Sigma-Aldrich     | Cat#A9251  |
| Glycerol                                              | Fisher Scientific | Cat#BP229  |
| BS3 (bis(sulfosuccinimidyl)suberate)                  | Thermo Scientific | Cat#21580  |
| Quantifoil R1.2/1.3 Holey Carbon Grids, 300 Mesh Gold | Quantifoil        | Cat#4230G  |

**Table S3. Cell lines and reagents used in this study.**
